# Supplementary material for: Anticholinesterase Activity of Budmunchiamine Alkaloids Revealed by Comparative Chemical Profiling of Two Albizia spp., Molecular Docking and Dynamic Studies
Source: MDPI journal article supplement (doi:10.3390/plants11233286), 2022-11-29
Supplement: s1 [file s1]

# Supporting Information

## Anticholinesterase Activity of Budmunchiamine Alkaloids Revealed by Comparative Chemical Profiling of Two *Albizia* spp., Molecular Docking and Dynamic Studies

Mai E. Hussein <sup>1,\*†</sup>, Osama G. Mohamed <sup>1,2,†</sup>, Ahlam M. El-Fishawy <sup>1</sup>, Hesham I. El-Askary <sup>1</sup>, Ahmed A. Hamed <sup>3</sup>, Marwa M. Abdel-Aziz <sup>4</sup>, Radwan Alnajjar <sup>5,6,7</sup>, Amany Belal <sup>8</sup>, Ahmed M. Naglah <sup>9,10</sup>, Abdulrahman A. Almehezia <sup>9</sup>, Ahmed A. Al-Karmalawy <sup>11</sup>, Ashootosh Tripathi <sup>2,12</sup> and Amira S. El Senousy <sup>1</sup>

<sup>1</sup> Pharmacognosy Department, Faculty of Pharmacy, Cairo University, Kasr el Aini St., Cairo 11562, Egypt

<sup>2</sup> Natural Products Discovery Core, Life Sciences Institute, University of Michigan, Ann Arbor, MI 48109, USA

<sup>3</sup> Microbial Chemistry Department, National Research Centre, 33 El-Buhouth Street, Dokki, Giza 12622, Egypt

<sup>4</sup> Regional Center for Mycology and Biotechnology (RCMB), Al-Azhar University, Cairo 11651, Egypt

<sup>5</sup> Department of Chemistry, Faculty of Science, University of Benghazi, Benghazi, Libya

<sup>6</sup> PharmD, Faculty of Pharmacy, Libyan International Medical University, Benghazi, Libya

<sup>7</sup> Department of Chemistry, University of Cape Town, Rondebosch 7701, South Africa

<sup>8</sup> Medicinal Chemistry Department, Faculty of Pharmacy, Beni-Suef University, Beni-Suef 62514, Egypt

<sup>9</sup> Drug Exploration and Development Chair (DEDC), Department of Pharmaceutical Chemistry, College of Pharmacy, King Saud University, Riyadh 11451, Saudi Arabia

<sup>10</sup> Peptide Chemistry Department, National Research Centre, Dokki, Cairo 12622, Egypt

<sup>11</sup> Pharmaceutical Chemistry Department, Faculty of Pharmacy, Ahram Canadian University, 6th of October City, Giza 12566, Egypt

<sup>12</sup> Department of Medicinal Chemistry, College of Pharmacy, University of Michigan, Ann Arbor, MI 48109, USA

\* Correspondence: mai.husein@pharma.cu.edu.eg

† These authors contributed equally to this work.

### List of Supporting Information

**Table S1:** Identified metabolites in the negative ion mode of ethanolic extracts of *A. lucidior* and *A. procera* leaves using UHPLC-MS/MS ..... 3-7

## List of Figures

|                                                                                                                      |    |
|----------------------------------------------------------------------------------------------------------------------|----|
| <b>Figure S1.</b> GNPS molecular network of two <i>Albizia</i> spp. ethanolic extracts in the positive ion mode..... | 8  |
| <b>Figure S2.</b> GNPS molecular network of two <i>Albizia</i> spp. ethanolic extracts in the negative ion mode..... | 9  |
| <b>Figure S3.</b> Superimposition of the redocked MF2 700 inhibitor (green) over its native one (red).....           | 10 |

**Table S1:** Identified metabolites in the negative ion mode of ethanolic extracts of *A. lucidior* and *A. procera* leaves using UHPLC-MS/MS

| No. | R <sub>t</sub><br>(min) | Name                                  | Ion m/z<br>ppm | Molecular<br>Formula                                         | MS/MS<br>fragmentation<br>product ions             | Ref  | Al | Ap |
|-----|-------------------------|---------------------------------------|----------------|--------------------------------------------------------------|----------------------------------------------------|------|----|----|
| 1   | 0.41                    | Dicaffeoylhexaric acid                | 533.1718       | C <sub>23</sub> H <sub>33</sub> O <sub>14</sub> <sup>-</sup> | 209.0653; 191.0561<br>85.0300                      | [1]  | √  | -  |
| 2   | 0.42                    | Quinic acid                           | 191.0563       | C <sub>7</sub> H <sub>11</sub> O <sub>6</sub> <sup>-</sup>   | 173.0447; 127.0396<br>93.0344; 85.0293             | [2]  | √  | √  |
| 3   | 0.43                    | Xylonic acid                          | 165.0403       | C <sub>5</sub> H <sub>9</sub> O <sub>6</sub> <sup>-</sup>    | 147.0275; 135.0269<br>105.0185; 87.0084<br>75.0086 | [2]  | √  | √  |
| 4   | 0.49                    | Gallic acid glucoside                 | 331.0686       | C <sub>13</sub> H <sub>15</sub> O <sub>10</sub> <sup>-</sup> | 211.0237; 169.0147<br>151.0026; 125.0241           | [1]  | -  | √  |
| 5   | 0.55                    | Gallic acid                           | 169.0143       | C <sub>7</sub> H <sub>5</sub> O <sub>5</sub> <sup>-</sup>    | 125.0258; 107.0153<br>97.0309; 79.0207             | [3]  | -  | √  |
| 6   | 0.76                    | Protocatechuic acid                   | 153.0190       | C <sub>7</sub> H <sub>5</sub> O <sub>4</sub> <sup>-</sup>    | 109.0293                                           | [4]  | √  | √  |
| 7   | 0.77                    | Vanillic acid-O-glucoside             | 329.0885       | C <sub>14</sub> H <sub>17</sub> O <sub>9</sub> <sup>-</sup>  | 209.0452; 167.0345<br>125.0246; 123.0449           | [1]  | -  | √  |
| 8   | 0.80                    | Catechol                              | 109.0287       | C <sub>6</sub> H <sub>5</sub> O <sub>2</sub> <sup>-</sup>    | 108.0217; 91.0191<br>81.0335; 66.0361              | [5]  | √  | -  |
| 9   | 0.88                    | Gentisic acid-5-O-xyloside            | 285.0619       | C <sub>12</sub> H <sub>13</sub> O <sub>8</sub> <sup>-</sup>  | 152.0114; 108.0216                                 | [6]  | √  | -  |
| 10  | 0.91                    | Digalloyl-glucose                     | 483.0779       | C <sub>20</sub> H <sub>19</sub> O <sub>14</sub> <sup>-</sup> | 313.0553; 271.0455<br>169.0137                     | [7]  | -  | √  |
| 11  | 0.99                    | Caffeic acid glucuronide              | 355.0685       | C <sub>15</sub> H <sub>15</sub> O <sub>10</sub> <sup>-</sup> | 209.0272; 191.0545<br>161.0240; 85.0292            | [2]  | √  | -  |
| 12  | 1.05                    | Methyl gallate                        | 183.0301       | C <sub>8</sub> H <sub>7</sub> O <sub>5</sub> <sup>-</sup>    | 168.0046; 124.0164                                 | [3]  | -  | √  |
| 13  | 1.06                    | <i>p</i> -coumaric acid-4-O-glucoside | 325.0936       | C <sub>15</sub> H <sub>17</sub> O <sub>8</sub> <sup>-</sup>  | 163.0395; 119.0499                                 | [8]  | √  | √  |
| 14  | 1.07                    | Aesculin                              | 339.0731       | C <sub>15</sub> H <sub>15</sub> O <sub>9</sub> <sup>-</sup>  | 177.0195                                           | [8]  | √  | -  |
| 15  | 1.22                    | Ferulic acid glucoside                | 355.1033       | C <sub>16</sub> H <sub>19</sub> O <sub>9</sub> <sup>-</sup>  | 309.0453; 193.0499<br>178.0266; 134.0374           | [9]  | -  | √  |
| 16  | 1.34                    | Shikimic acid                         | 173.0452       | C <sub>7</sub> H <sub>9</sub> O <sub>5</sub> <sup>-</sup>    | 136.9332; 111.0452<br>93.0360; 85.0303<br>83.0133  | [10] | √  | √  |
| 17  | 1.36                    | Caffeoylquinic acid                   | 353.0880       | C <sub>16</sub> H <sub>17</sub> O <sub>9</sub> <sup>-</sup>  | 191.0556; 173.0445<br>135.0446; 85.0297            | [8]  | √  | √  |
| 18  | 1.36                    | Umbelliferone                         | 161.0241       | C <sub>9</sub> H <sub>5</sub> O <sub>3</sub> <sup>-</sup>    | 133.0288                                           | [11] | √  | -  |
| 19  | 1.37                    | Caffeic acid                          | 179.0352       | C <sub>9</sub> H <sub>7</sub> O <sub>4</sub> <sup>-</sup>    | 135.0459; 89.0028                                  | [1]  | √  | √  |
| 20  | 1.46                    | Esculetin                             | 177.0193       | C <sub>9</sub> H <sub>5</sub> O <sub>4</sub> <sup>-</sup>    | 149.0253; 133.0296<br>105.0347; 89.0399            | [3]  | √  | √  |

| No. | R <sub>t</sub><br>(min) | Name                                             | Ion m/z<br>ppm | Molecular<br>Formula                                         | MS/MS<br>fragmentation<br>product ions                                               | Ref  | Al | Ap |
|-----|-------------------------|--------------------------------------------------|----------------|--------------------------------------------------------------|--------------------------------------------------------------------------------------|------|----|----|
| 21  | 1.92                    | Rosmarinic acid- <i>O</i> -glucoside             | 521.2047       | C <sub>24</sub> H <sub>25</sub> O <sub>13</sub> <sup>-</sup> | 359.1511; 344.1271                                                                   | [12] | -  | √  |
| 22  | 2.03                    | Syringic acid                                    | 197.0457       | C <sub>9</sub> H <sub>9</sub> O <sub>5</sub> <sup>-</sup>    | 169.0142; 124.0168                                                                   | [7]  | -  | √  |
| 23  | 2.09                    | Feruloyl quinic acid                             | 367.1042       | C <sub>17</sub> H <sub>19</sub> O <sub>9</sub> <sup>-</sup>  | 193.0521; 173.0454                                                                   | [13] | -  | √  |
| 24  | 2.10                    | <i>p</i> -coumaroyl quinic acid                  | 337.0934       | C <sub>16</sub> H <sub>17</sub> O <sub>8</sub> <sup>-</sup>  | 191.0556; 163.0394<br>119.0491; 93.0342                                              | [12] | √  | √  |
| 25  | 2.35                    | <i>p</i> -coumaric acid                          | 163.0401       | C <sub>9</sub> H <sub>7</sub> O <sub>3</sub> <sup>-</sup>    | 119.0510; 93.0350<br>91.0568                                                         | [1]  | √  | √  |
| 26  | 2.45                    | Myricetin-3- <i>O</i> -rutinoside                | 625.1415       | C <sub>27</sub> H <sub>29</sub> O <sub>17</sub> <sup>-</sup> | 317.0293; 316.0234<br>287.0917; 271.0252<br>178.9991; 151.0043                       | [14] | -  | √  |
| 27  | 2.45                    | Coumaroyl- <i>O</i> -galloyl glucose             | 477.1040       | C <sub>22</sub> H <sub>21</sub> O <sub>12</sub> <sup>-</sup> | 313.0558; 169.0151                                                                   | [7]  | -  | √  |
| 28  | 2.48                    | Hexosylrutin                                     | 771.1992       | C <sub>33</sub> H <sub>39</sub> O <sub>21</sub> <sup>-</sup> | 609.1453; 463.0886<br>301.0346; 300.0273                                             | [9]  | -  | √  |
| 29  | 2.49                    | Methyl caffeoyl quinate                          | 367.1033       | C <sub>17</sub> H <sub>19</sub> O <sub>9</sub> <sup>-</sup>  | 191.0564; 179.0349<br>161.0249; 135.0452                                             | [13] | √  | √  |
| 30  | 2.51                    | Quercetin rhamnosyl-<br>rutinoside               | 755.2053       | C <sub>33</sub> H <sub>39</sub> O <sub>20</sub> <sup>-</sup> | 609.1423; 301.0342<br>300.0280                                                       | [9]  | √  | -  |
| 31  | 2.51                    | Myricetin-3- <i>O</i> -glucoside                 | 479.0837       | C <sub>21</sub> H <sub>19</sub> O <sub>13</sub> <sup>-</sup> | 317.0287; 316.0281<br>271.0235; 178.9972<br>151.0023                                 | [1]  | -  | √  |
| 32  | 2.51                    | Myricetin-3- <i>O</i> -glucuronide               | 493.0630       | C <sub>21</sub> H <sub>17</sub> O <sub>14</sub> <sup>-</sup> | 317.0297; 299.0184<br>271.0262; 178.9974<br>151.0025                                 | [15] | -  | √  |
| 33  | 2.54                    | Naringenin-7- <i>O</i> -glucoside                | 433.1151       | C <sub>21</sub> H <sub>21</sub> O <sub>10</sub> <sup>-</sup> | 313.0707; 271.0618<br>193.0381; 119.0493                                             | [10] | -  | √  |
| 34  | 2.62                    | Myricetin-3- <i>O</i> -arabinoside               | 449.0760       | C <sub>20</sub> H <sub>17</sub> O <sub>12</sub> <sup>-</sup> | 317.0326; 316.0229<br>287.0182; 271.0238<br>178.9977                                 | [14] | -  | √  |
| 35  | 2.62                    | Kaempferol-rhamnosyl-<br>galactoside-rhamnoside  | 739.2108       | C <sub>33</sub> H <sub>39</sub> O <sub>19</sub> <sup>-</sup> | 593.1507; 285.0403<br>284.0334; 255.0299                                             | [9]  | √  | √  |
| 36  | 2.65                    | Quercetin-3- <i>O</i> -sambubioside              | 595.1318       | C <sub>26</sub> H <sub>27</sub> O <sub>16</sub> <sup>-</sup> | 301.0348; 300.0287<br>271.0252; 255.0304<br>178.9990; 151.0041                       | [16] | √  | √  |
| 37  | 2.69                    | Kaempferol-3-(2 <i>G</i> -<br>xylosylrutinoside) | 725.1944       | C <sub>32</sub> H <sub>37</sub> O <sub>19</sub> <sup>-</sup> | 575.1360; 285.0391<br>284.0327; 255.0304<br>227.0334; 151.0034                       | [9]  | √  | √  |
| 38  | 2.69                    | Rutin                                            | 609.1468       | C <sub>27</sub> H <sub>29</sub> O <sub>16</sub> <sup>-</sup> | 445.0696; 343.0456<br>301.0351; 300.0275<br>271.0242; 255.0297<br>178.9975; 151.0029 | [2]  | √  | √  |

| No. | R <sub>t</sub><br>(min) | Name                                               | Ion m/z<br>ppm | Molecular<br>Formula                                         | MS/MS<br>fragmentation<br>product ions                                     | Ref  | Al | Ap |
|-----|-------------------------|----------------------------------------------------|----------------|--------------------------------------------------------------|----------------------------------------------------------------------------|------|----|----|
| 39  | 2.71                    | Quercetin- <i>O</i> -galloyl-glucoside             | 615.0990       | C <sub>28</sub> H <sub>23</sub> O <sub>16</sub> <sup>-</sup> | 463.0890; 313.0557<br>301.0354; 300.0281<br>271.0246; 255.0286<br>169.0143 | [2]  | √  | -  |
| 40  | 2.76                    | Myricetin-3- <i>O</i> -rhamnoside<br>(myricitrin)  | 463.0894       | C <sub>21</sub> H <sub>19</sub> O <sub>12</sub> <sup>-</sup> | 317.0298; 316.0232<br>287.0202; 271.0248<br>178.9984                       | [3]  | √  | √  |
| 41  | 2.79                    | Quercetin-3- <i>O</i> -glucuronide                 | 477.0684       | C <sub>21</sub> H <sub>17</sub> O <sub>13</sub> <sup>-</sup> | 301.0354; 255.0295<br>178.9984; 151.0033                                   | [15] | -  | √  |
| 42  | 2.80                    | Kaempferol-3- <i>O</i> -rutinoside                 | 593.1522       | C <sub>27</sub> H <sub>29</sub> O <sub>15</sub> <sup>-</sup> | 285.0403; 284.0323<br>255.0299; 227.0345<br>151.0033                       | [2]  | √  | √  |
| 43  | 2.85                    | Quercetin pentose deoxy-<br>hexose                 | 579.1375       | C <sub>26</sub> H <sub>27</sub> O <sub>15</sub> <sup>-</sup> | 447.0832; 301.0326<br>300.0288; 255.0314                                   | [9]  | √  | -  |
| 44  | 2.85                    | <i>p</i> -Hydroxybenzoic acid                      | 137.0245       | C <sub>7</sub> H <sub>5</sub> O <sub>3</sub> <sup>-</sup>    | 93.0354; 65.0397                                                           | [13] | √  | -  |
| 45  | 2.85                    | Azelaic acid                                       | 187.0975       | C <sub>9</sub> H <sub>15</sub> O <sub>4</sub> <sup>-</sup>   | 169.0863; 125.0980<br>123.0825; 97.0669                                    | [17] | √  | -  |
| 46  | 2.93                    | Kaempferol-3- <i>O</i> -sambubioside               | 579.2086       | C <sub>26</sub> H <sub>27</sub> O <sub>15</sub> <sup>-</sup> | 417.1552; 285.0408                                                         | [18] | √  | -  |
| 47  | 2.94                    | Quercetin-3- <i>O</i> -arabinoside<br>(Avicularin) | 433.0789       | C <sub>20</sub> H <sub>17</sub> O <sub>11</sub> <sup>-</sup> | 301.0344; 300.0275<br>271.0241; 255.0301<br>151.0043                       | [9]  | √  | √  |
| 48  | 2.96                    | Myrciacitrin                                       | 477.1030       | C <sub>23</sub> H <sub>25</sub> O <sub>11</sub> <sup>-</sup> | 317.0247; 316.0231<br>287.0188; 178.9986<br>151.0023                       | [9]  | -  | √  |
| 49  | 2.98                    | Kaempferol-3- <i>O</i> -glucuronide                | 461.0736       | C <sub>21</sub> H <sub>17</sub> O <sub>12</sub> <sup>-</sup> | 285.0406; 257.0453<br>229.0506                                             | [14] | -  | √  |
| 50  | 3.00                    | Quercetin 3- <i>O</i> -rhamnoside<br>(Quercitrin)  | 447.0950       | C <sub>21</sub> H <sub>19</sub> O <sub>11</sub> <sup>-</sup> | 301.0356; 300.0281<br>271.0249; 255.0301<br>178.9987; 151.0043             | [3]  | √  | √  |
| 51  | 3.06                    | Ferulic acid                                       | 193.0508       | C <sub>10</sub> H <sub>9</sub> O <sub>4</sub> <sup>-</sup>   | 161.0247; 134.0374<br>133.0298                                             | [1]  | √  | √  |
| 52  | 3.10                    | Phloridzin                                         | 435.1304       | C <sub>21</sub> H <sub>23</sub> O <sub>10</sub> <sup>-</sup> | 273.0775; 167.0353                                                         | [3]  | -  | √  |
| 53  | 3.18                    | Quercetin benzoyl-glucoside                        | 583.4803       | C <sub>28</sub> H <sub>23</sub> O <sub>14</sub> <sup>-</sup> | 463.0891; 301.0322<br>300.0269; 271.0229<br>255.0282; 152.0106             | [7]  | √  | -  |

| No. | R <sub>t</sub><br>(min) | Name                                 | Ion m/z<br>ppm | Molecular<br>Formula                                         | MS/MS<br>fragmentation<br>product ions                         | Ref  | Al | Ap |
|-----|-------------------------|--------------------------------------|----------------|--------------------------------------------------------------|----------------------------------------------------------------|------|----|----|
| 54  | 3.18                    | Kaempferol-3-O-rhamnoside            | 431.0988       | C <sub>21</sub> H <sub>19</sub> O <sub>10</sub> <sup>-</sup> | 285.0416; 284.0340<br>255.0310; 227.0360<br>151.0036           | [2]  | √  | √  |
| 55  | 3.19                    | Myricetin                            | 317.0309       | C <sub>15</sub> H <sub>9</sub> O <sub>8</sub> <sup>-</sup>   | 178.9998; 151.0448<br>137.0250                                 | [9]  | -  | √  |
| 56  | 3.21                    | Quercetin-3-O-glucosyl-6''-acetate   | 505.1002       | C <sub>23</sub> H <sub>21</sub> O <sub>13</sub> <sup>-</sup> | 329.0664; 301.0343<br>300.0280; 271.0241<br>255.0290; 151.0023 | [10] | -  | √  |
| 57  | 3.21                    | Myricetin-O-(O-galloyl)-3-rhamnoside | 615.1002       | C <sub>28</sub> H <sub>23</sub> O <sub>16</sub> <sup>-</sup> | 463.0895; 317.0315<br>178.9998; 169.0148<br>151.0047           | [3]  | -  | √  |
| 58  | 3.21                    | Quercetin-di-O-glucoside             | 625.1202       | C <sub>27</sub> H <sub>29</sub> O <sub>17</sub> <sup>-</sup> | 463.0891; 301.0359<br>300.0284; 255.0315                       | [1]  | √  | -  |
| 59  | 3.21                    | Chrysoeriol-O-glucoside              | 461.1084       | C <sub>22</sub> H <sub>21</sub> O <sub>11</sub> <sup>-</sup> | 299.0200                                                       | [19] | -  | √  |
| 60  | 3.41                    | Quercetin galloyl rhamnoside         | 599.1051       | C <sub>28</sub> H <sub>23</sub> O <sub>15</sub> <sup>-</sup> | 447.0920; 383.1042<br>301.0368; 273.0402<br>178.9991; 151.0041 | [2]  | -  | √  |
| 61  | 3.41                    | Kaempferol acetyl glycoside          | 489.1044       | C <sub>23</sub> H <sub>21</sub> O <sub>12</sub> <sup>-</sup> | 285.0409; 284.0335<br>255.0306; 227.0359                       | [1]  | -  | √  |
| 62  | 3.43                    | Quercetin coumaroyl glucoside        | 609.1263       | C <sub>30</sub> H <sub>25</sub> O <sub>14</sub> <sup>-</sup> | 463.0872; 301.0352<br>300.0276; 271.0238<br>178.9977; 151.0031 | [1]  | √  | -  |
| 63  | 3.46                    | Quercetin feruloyl glucoside         | 639.1359       | C <sub>31</sub> H <sub>27</sub> O <sub>15</sub> <sup>-</sup> | 463.0881; 301.0350<br>300.0276; 271.0248<br>255.0291; 151.0025 | [7]  | √  | -  |
| 64  | 3.48                    | Ethyl caffeate                       | 207.0665       | C <sub>11</sub> H <sub>11</sub> O <sub>4</sub> <sup>-</sup>  | 179.0352; 161.0250<br>135.0453; 134.0376                       | [13] | √  | √  |
| 65  | 3.52                    | <i>p</i> -methoxycinnamic acid       | 177.0563       | C <sub>10</sub> H <sub>9</sub> O <sub>3</sub> <sup>-</sup>   | 162.0317; 145.0296<br>133.0061; 118.0427                       | [20] | -  | √  |
| 66  | 3.55                    | Quercetin                            | 301.0345       | C <sub>15</sub> H <sub>9</sub> O <sub>7</sub> <sup>-</sup>   | 178.9993; 151.0045<br>121.0296; 107.0147                       | [1]  | √  | √  |
| 67  | 3.55                    | Kaempferol                           | 285.0396       | C <sub>15</sub> H <sub>9</sub> O <sub>6</sub> <sup>-</sup>   | 243.0301; 217.0505<br>199.0403; 175.0397                       | [1]  | √  | √  |
| 68  | 3.60                    | Trihydroxyoctadienoic acid           | 327.2182       | C <sub>18</sub> H <sub>31</sub> O <sub>5</sub> <sup>-</sup>  | 291.1969; 229.1449<br>211.1349; 171.1033                       | [2]  | √  | √  |
| 69  | 3.77                    | Trihydroxyoctadecenoic acid          | 329.2336       | C <sub>18</sub> H <sub>33</sub> O <sub>5</sub> <sup>-</sup>  | 229.1452; 211.1348<br>171.1031                                 | [2]  | √  | √  |
| 70  | 3.85                    | Naringenin                           | 271.0623       | C <sub>15</sub> H <sub>11</sub> O <sub>5</sub> <sup>-</sup>  | 151.0039; 119.0509<br>65.0045                                  | [1]  | -  | √  |
| 71  | 3.85                    | Dihydroxy palmitic acid              | 287.2233       | C <sub>16</sub> H <sub>31</sub> O <sub>4</sub> <sup>-</sup>  | 269.2144; 241.2189<br>223.2067                                 | [2]  | √  | √  |

| No. | R <sub>t</sub><br>(min) | Name                                     | Ion m/z<br>ppm | Molecular<br>Formula                                                       | MS/MS<br>fragmentation<br>product ions                       | Ref  | Al | Ap |
|-----|-------------------------|------------------------------------------|----------------|----------------------------------------------------------------------------|--------------------------------------------------------------|------|----|----|
| 72  | 4.42                    | Dihydroxyoctadecadienoic acid            | 311.2223       | C <sub>18</sub> H <sub>31</sub> O <sub>4</sub> <sup>-</sup>                | 311.2208; 293.2096<br>275.2005; 223.1705                     | [19] | √  | √  |
| 73  | 4.51                    | Epoxy-hydroxyoctadeca-<br>dienoic acid   | 309.2073       | C <sub>18</sub> H <sub>29</sub> O <sub>4</sub> <sup>-</sup>                | 291.1959; 273.1980<br>221.1541                               | [19] | √  | √  |
| 74  | 4.56                    | Pinocembrin                              | 255.0665       | C <sub>15</sub> H <sub>11</sub> O <sub>4</sub> <sup>-</sup>                | 213.0556; 171.0443<br>151.0031; 107.0134<br>83.0136; 65.0037 | [1]  | -  | √  |
| 75  | 4.58                    | Dihydroxyoctadecenoic acid               | 313.2386       | C <sub>18</sub> H <sub>33</sub> O <sub>4</sub> <sup>-</sup>                | 295.2300; 277.2174<br>183.1392                               | [19] | -  | √  |
| 76  | 4.98                    | Sphingolipid conjugate II                | 564.3315       | C <sub>27</sub> H <sub>51</sub> O <sub>9</sub> NP <sup>-</sup>             | 279.2329                                                     | [19] | √  | -  |
| 77  | 5.00                    | 13-keto-octadeca-<br>9,11-dienoic acid   | 293.2126       | C <sub>18</sub> H <sub>29</sub> O <sub>3</sub> <sup>-</sup>                | 275.2027; 223.1346<br>195.1396; 179.1463                     | [5]  | √  | √  |
| 78  | 5.13                    | Hydroxyoctadecenoic acid                 | 297.1535       | C <sub>18</sub> H <sub>33</sub> O <sub>3</sub> <sup>-</sup>                | 279.9880; 183.0120                                           | [19] | √  | √  |
| 79  | 5.17                    | 9-hydroxy-10,12-<br>octadecadienoic acid | 295.2276       | C <sub>18</sub> H <sub>31</sub> O <sub>3</sub> <sup>-</sup>                | 277.2178; 195.1393<br>171.1029                               | [5]  | √  | √  |
| 80  | 5.20                    | Sphingolipid conjugate III               | 566.3478       | C <sub>27</sub> H <sub>53</sub> O <sub>9</sub> NP <sup>-</sup>             | 281.2497                                                     | [19] | √  | -  |
| 81  | 5.76                    | Hydroxy palmitic acid                    | 271.2275       | C <sub>16</sub> H <sub>31</sub> O <sub>3</sub> <sup>-</sup>                | 253.2167; 225.2220                                           | [19] | √  | √  |
| 82  | 5.93                    | Linolenic acid                           | 277.2171       | C <sub>18</sub> H <sub>29</sub> O <sub>2</sub> <sup>-</sup>                | 259.2068; 234.1868                                           | [5]  | √  | √  |
| 83  | 5.96                    | Yohimbic acid                            | 339.1999       | C <sub>20</sub> H <sub>23</sub> N <sub>2</sub> O <sub>3</sub> <sup>-</sup> | 183.0117                                                     | [10] | √  | √  |
| 84  | 6.15                    | Linoleic acid                            | 279.2326       | C <sub>18</sub> H <sub>31</sub> O <sub>2</sub> <sup>-</sup>                | 261.2199; 59.0138                                            | [5]  | √  | √  |
| 85  | 6.32                    | Palmitic acid                            | 255.2328       | C <sub>16</sub> H <sub>31</sub> O <sub>2</sub> <sup>-</sup>                | 234.9956; 206.9872<br>166.9912                               | [19] | √  | √  |
| 86  | 6.44                    | Oleic acid                               | 281.2486       | C <sub>18</sub> H <sub>33</sub> O <sub>2</sub> <sup>-</sup>                | 260.9945; 240.9874                                           | [5]  | √  | √  |
| 87  | 6.74                    | Stearic acid                             | 283.2632       | C <sub>18</sub> H <sub>35</sub> O <sub>2</sub> <sup>-</sup>                | 242.9835; 179.0094                                           | [19] | √  | √  |

√, found; -, not found; Al, *A. lucidior*; Ap, *A. procera*

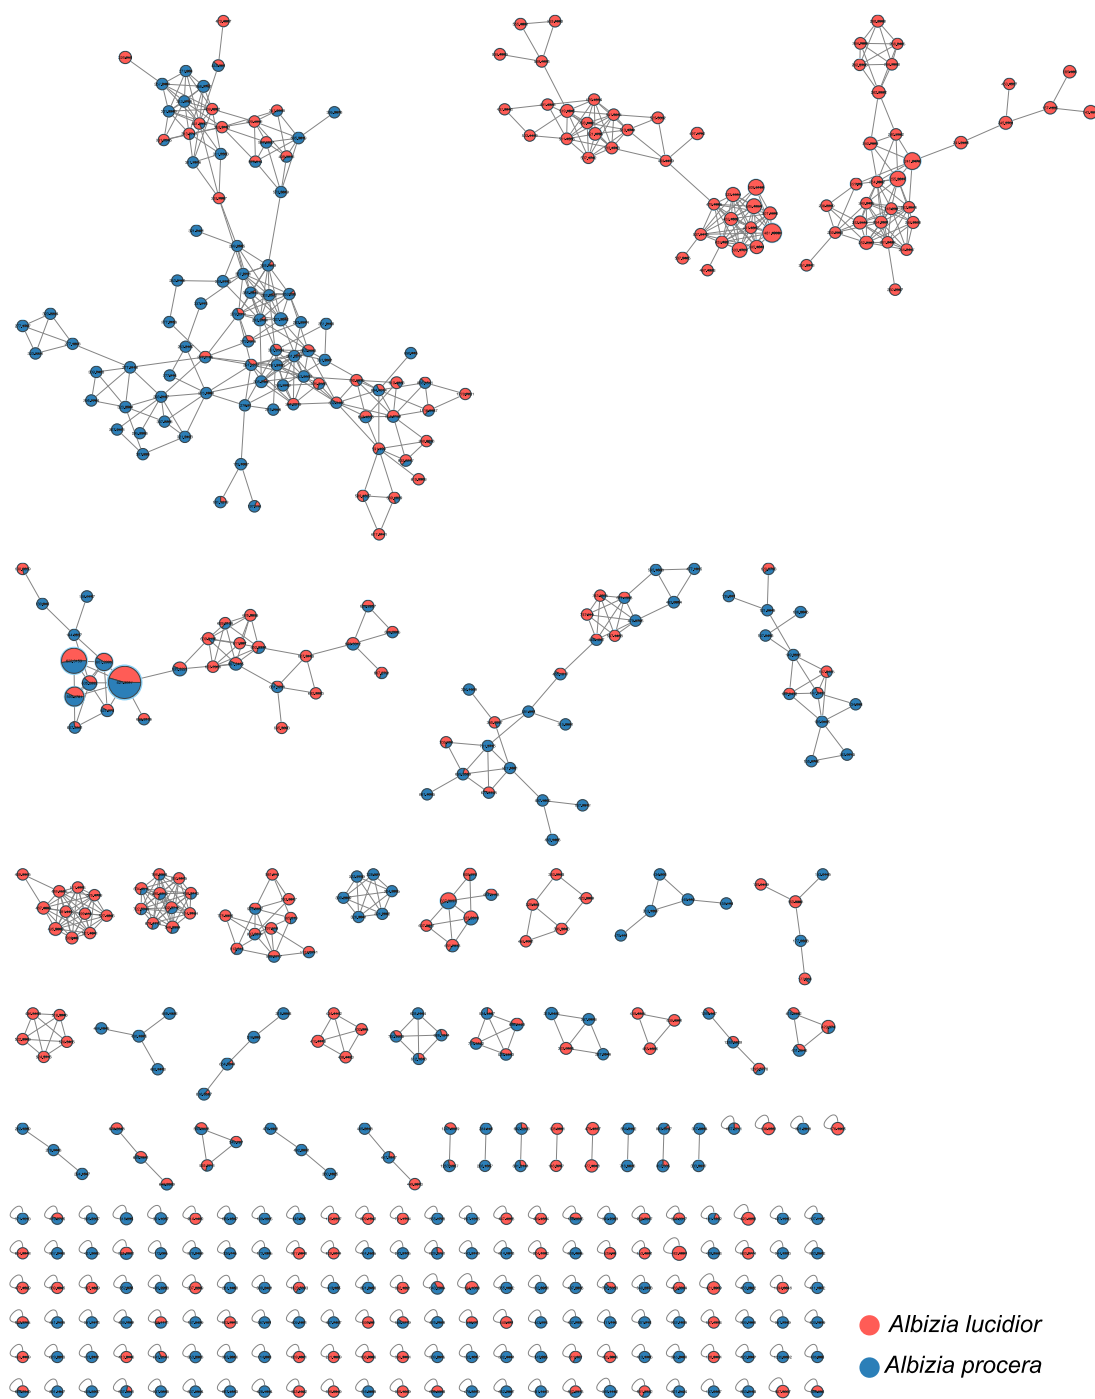

**Figure S1.** GNPS molecular network of two *Albizia* spp. ethanolic extracts in the positive ion mode. Each node is displayed as pie chart representing relative abundance of the metabolite with red and blue colors in the ethanolic extracts of *A. lucidior* and *A. procera*, respectively. The node label represents precursor mass ( $m/z$ ). The node size represents the sum of precursor ion intensity.



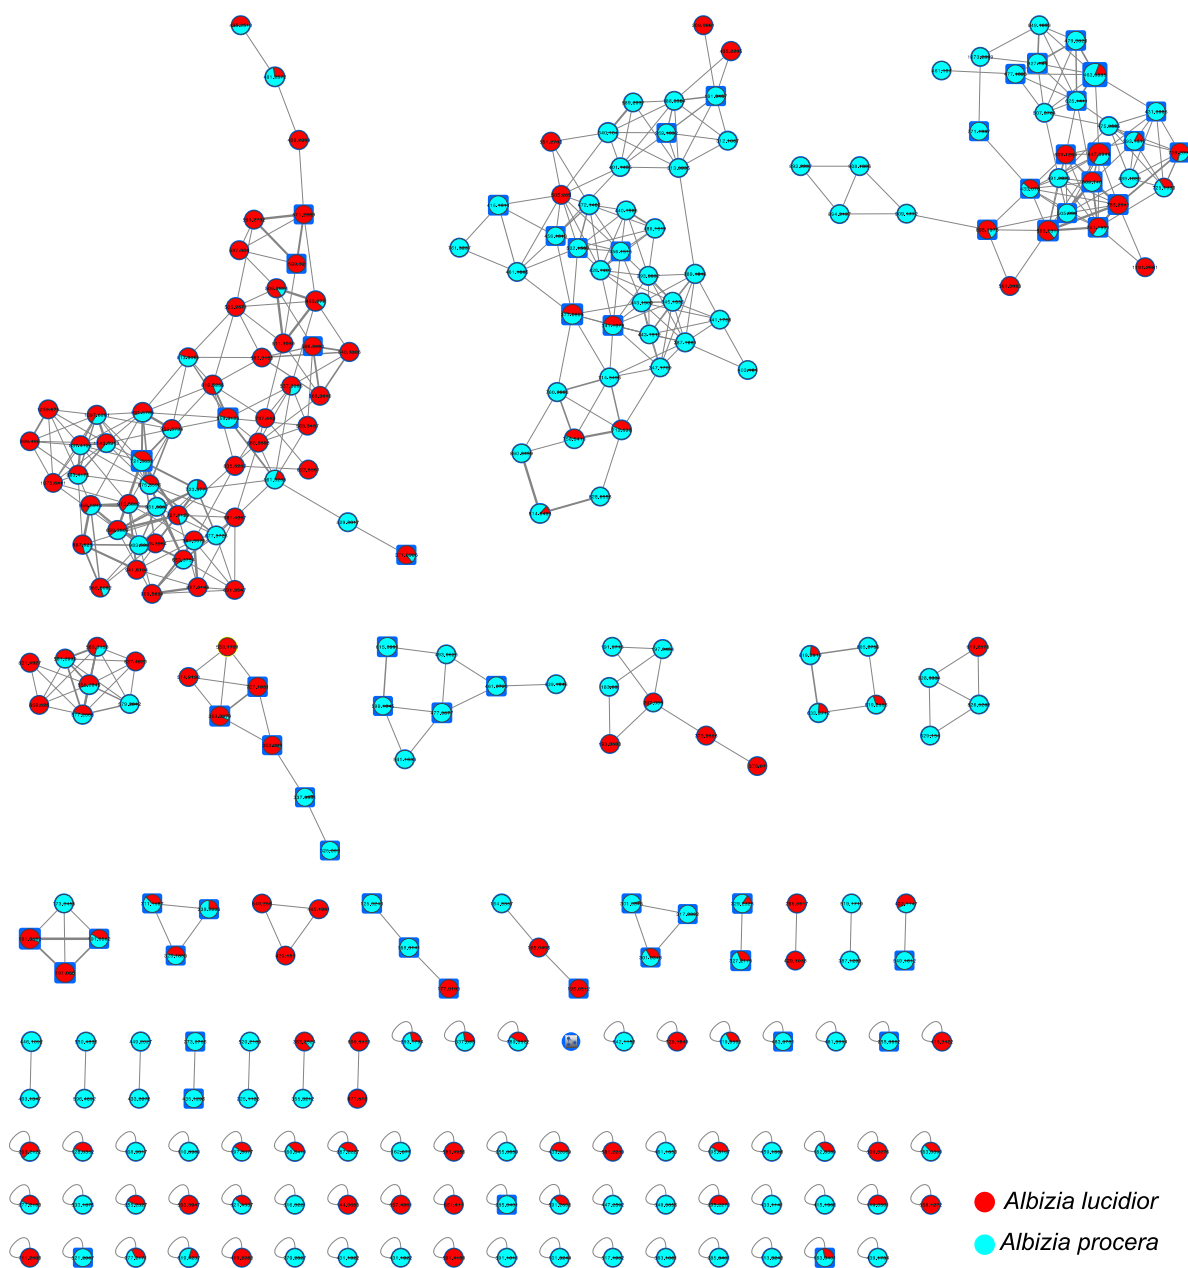

**Figure S2.** GNPS molecular network of two *Albizia* spp. ethanolic extracts in the negative ion mode. Each node is displayed as pie chart representing relative abundance of the metabolite with red and blue colors in the ethanolic extracts of *A. lucidior* and *A. procera*, respectively. The node label represents precursor mass ( $m/z$ ). The node size represents the sum of precursor ion intensity.

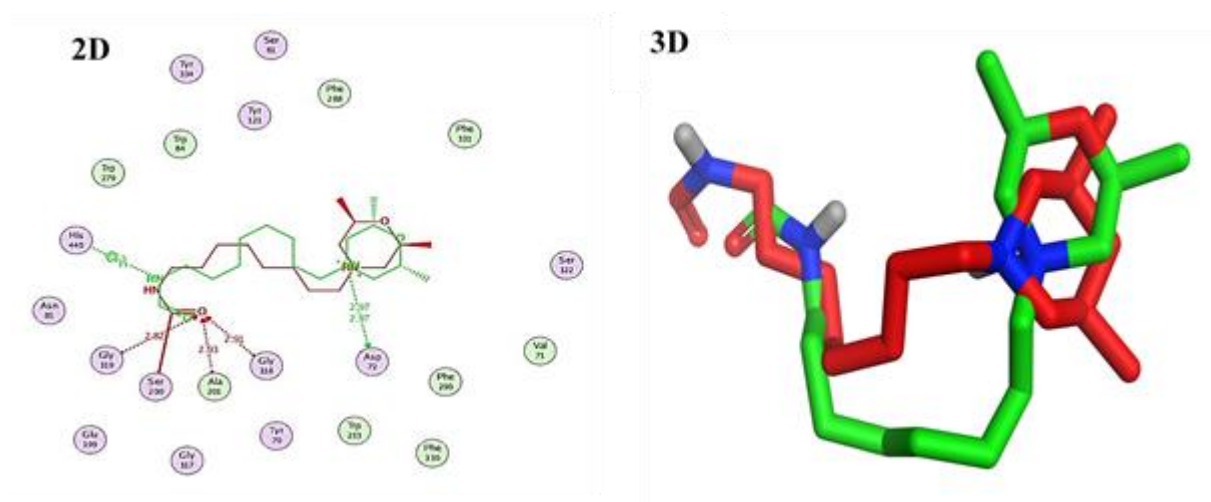

**Figure S3.** Superimposition of the redocked MF2 700 inhibitor (green) over its native one (red).

## References

1. Kramberger, K.; Barlič-Maganja, D.; Bandelj, D.; Baruca Arbeiter, A.; Peeters, K.; Miklavčič Višnjevec, A.; Jenko Pražnikar, Z. HPLC-DAD-ESI-QTOF-MS determination of bioactive compounds and antioxidant activity comparison of the hydroalcoholic and water extracts from two *Helichrysum italicum* species. *Metabolites* **2020**, *10*, 403.
2. Rosa, W.; da Silva Domingos, O.; de Oliveira Salem, P.P.; Caldas, I.S.; Murgu, M.; Lago, J.H.G.; Sartorelli, P.; Dias, D.F.; Chagas-Paula, D.A.; Soares, M.G. *In vivo* anti-inflammatory activity of Fabaceae species extracts screened by a new *ex vivo* assay using human whole blood. *Phytochem. Anal.* **2021**, *32*, 859-883.
3. Singh, D.; Siew, Y.-Y.; Chong, T.-I.; Yew, H.-C.; Ho, S.S.-W.; Lim, C.S.E.-S.; Tan, W.-X.; Neo, S.-Y.; Koh, H.-L. Identification of phytoconstituents in *Leea indica* (Burm. F.) Merr. leaves by high performance liquid chromatography micro time-of-flight mass spectrometry. *Molecules* **2019**, *24*, 714.
4. Ateba, S.B.; Njamen, D.; Gatterer, C.; Scherzer, T.; Zehl, M.; Kählig, H.; Krenn, L. Rare phenolic structures found in the aerial parts of *Eriosema laurentii* De Wild. *Phytochemistry* **2016**, *128*, 5-11.
5. Kalogiouri, N.P.; Aalizadeh, R.; Dasenaki, M.E.; Thomaidis, N.S. Authentication of Greek PDO kalamata table olives: A novel non-target high resolution mass spectrometric approach. *Molecules* **2020**, *25*, 2919.
6. Shivanagoudra, S.R.; Perera, W.H.; Perez, J.L.; Athrey, G.; Sun, Y.; Wu, C.S.; Jayaprakasha, G.; Patil, B.S. *In vitro* and *in silico* elucidation of antidiabetic and anti-inflammatory

- activities of bioactive compounds from *Momordica charantia* L. *Bioorg. Med. Chem.* **2019**, *27*, 3097-3109.
7. Sobeh, M.; Rezq, S.; Sabry, O.M.; Abdelfattah, M.A.O.; El Raey, M.A.; El-Kashak, W.A.; El-Shazly, A.M.; Mahmoud, M.F.; Wink, M. *Albizia anthelmintica*: HPLC-MS/MS profiling and *in vivo* anti-inflammatory, pain killing and antipyretic activities of its leaf extract. *Biomed. Pharmacother.* **2019**, *115*, 108882.
  8. Mudrić, S.Ž.; Gašić, U.M.; Dramićanin, A.M.; Ćirić, I.Ž.; Milojković-Opsenica, D.M.; Popović-Dorđević, J.B.; Momirović, N.M.; Tešić, Ž.L. The polyphenolics and carbohydrates as indicators of botanical and geographical origin of Serbian autochthonous clones of red spice paprika. *Food Chem.* **2017**, *217*, 705-715.
  9. Abu-Reidah, I.M.; Arráez-Román, D.; Warad, I.; Fernández-Gutiérrez, A.; Segura-Carretero, A. UHPLC/MS<sup>2</sup>-based approach for the comprehensive metabolite profiling of bean (*Vicia faba* L.) by-products: A promising source of bioactive constituents. *Food Res. Int.* **2017**, *93*, 87-96.
  10. Elkousy, R.H.; Said, Z.N.A.; Abd El-Baseer, M.A.; Abu El wafa, S.A. Antiviral activity of castor oil plant (*Ricinus communis*) leaf extracts. *J. Ethnopharmacol.* **2021**, *271*, 113878.
  11. Elez Garofulić, I.; Malin, V.; Repajić, M.; Zorić, Z.; Pedisić, S.; Sterniša, M.; Smole Možina, S.; Dragović-Uzelac, V. Phenolic Profile, Antioxidant Capacity and Antimicrobial Activity of Nettle Leaves Extracts Obtained by Advanced Extraction Techniques. *Molecules* **2021**, *26*, 6153.
  12. Sobeh, M.; Hassan, S.A.; El Raey, M.A.; Khalil, W.A.; Hassan, M.A.; Wink, M. Polyphenolics from *Albizia harveyi* exhibit antioxidant activities and counteract oxidative damage and ultra-structural changes of cryopreserved bull semen. *Molecules* **2017**, *22*, 1993.
  13. Ruan, J.; Yan, J.; Zheng, D.; Sun, F.; Wang, J.; Han, L.; Zhang, Y.; Wang, T. Comprehensive chemical profiling in the ethanol extract of *Pluchea indica* aerial parts by liquid chromatography/mass spectrometry analysis of its silica gel column chromatography fractions. *Molecules* **2019**, *24*, 2784.
  14. Fotirić Akšić, M.; Dabić Zagorac, D.; Sredojević, M.; Milivojević, J.; Gašić, U.; Meland, M.; Natić, M. Chemometric characterization of strawberries and blueberries according to their phenolic profile: Combined effect of cultivar and cultivation system. *Molecules* **2019**, *24*, 4310.
  15. Limwachiranon, J.; Huang, H.; Li, L.; Duan, Z.; Luo, Z. Recovery of lotus (*Nelumbo nucifera* Gaertn.) seedpod flavonoids using polar macroporous resins: The updated understanding on adsorption/desorption mechanisms and the involved intermolecular attractions and bonding. *Food Chem.* **2019**, *299*, 125108.
  16. Huang, Q.; Zhang, F.; Liu, S.; Jiang, Y.; Ouyang, D. Systematic investigation of the pharmacological mechanism for renal protection by the leaves of *Eucommia ulmoides* Oliver using UPLC-Q-TOF/MS combined with network pharmacology analysis. *Biomed. Pharmacother.* **2021**, *140*, 111735.
  17. Chiriac, E.R.; Chițescu, C.L.; Borda, D.; Lupoae, M.; Gird, C.E.; Geană, E.-I.; Blaga, G.-V.; Boscencu, R. Comparison of the polyphenolic profile of *Medicago sativa* L. and *Trifolium*

- pratense* L. sprouts in different germination stages using the UHPLC-Q exactive hybrid quadrupole orbitrap high-resolution mass spectrometry. *Molecules* **2020**, *25*, 2321.
18. Zhang, T.; Qiu, F.; Chen, L.; Liu, R.; Chang, M.; Wang, X. Identification and *in vitro* anti-inflammatory activity of different forms of phenolic compounds in *Camellia oleifera* oil. *Food Chem.* **2021**, *344*, 128660.
  19. Farag, M.A.; Khattab, A.R.; Maamoun, A.A.; Kropf, M.; Heiss, A.G. UPLC-MS metabolome based classification of Lupinus and Lens seeds: A prospect for phyto-equivalency of its different accessions. *Food Res. Int.* **2019**, *115*, 379-392.
  20. Song, Q.; Song, Y.; Zhang, N.; Li, J.; Jiang, Y.; Zhang, K.; Zhang, Q.; Tu, P. Potential of hyphenated ultra-high performance liquid chromatography-scheduled multiple reaction monitoring algorithm for large-scale quantitative analysis of traditional Chinese medicines. *RSC Adv.* **2015**, *5*, 57372-57382.
